# Supplementary material for: Helicobacter pylori bab Paralog Distribution and Association with cagA, vacA, and homA/B Genotypes in American and South Korean Clinical Isolates
Source: PubMed Central journal article supplement (PMC4552749; doi:10.1371/journal.pone.0137078), 2015-08-28
Supplement: pone.0137078.s003.pdf [file pone.0137078.s003.pdf]

|           | 1                    | 50                       | 100                  |
|-----------|----------------------|--------------------------|----------------------|
| G27-babc  | MKKHILSLALGSLLVSA    | SAEDDGFYTSVGYQIG         | EAAQMVNTTKGIQELSDRYE |
| KH-k17    | MKKHILSLALGSLLVSA    | SAEDDGFYTSVGYQIG         | EAAQMVNTTKGIQELSDRYE |
| KH-k241   | MKKHILSLALGSLLVSA    | SAEDDGFYTSVGYQIG         | EAAQMVNTTKGIQELSDRYE |
| AH-J58    | MKKHILSLALGSLLVSTLSA | EDDGFYTSVGYQIG           | EAAQMVNTTKGIQQLSDNYE |
| AH-J68    | MKKKT---             | LLLSLSFLHAEDDGFYTSVGYQIG | EAAQMVNTTKGIQQLSDNYE |
| AH-J44    | MKKHILSLTLGSLLVSTLSA | EDDGFYTSVGYQIG           | EAAQMVNTTKGIQELSDNYE |
| AH-J75    | MKKHILSLTLGSLLVSA    | SAEDDGFYTSVGYQIG         | EAAQMVNTTKGIQELSDNYE |
| AH-B147   | MKKHILSLTLGSLLVSTLSA | EDDGFYTSVGYQIG           | EAAQMVNTTKGIQELSDNYE |
| AH-B175A  | MKKHILSLTLGSLLVSTLSA | EDDGFYTSVGYQIG           | EAAQMVNTTKGIQELSDNYE |
| AH-B201A  | MKKHILSLTLGSLLVSTLSA | EDDGFYTSVGYQIG           | EAAQMVNTTKGIQELSDNYE |
| AH-B253A  | MKKHILSLTLGSLLVSA    | SAEDDGFYTSVGYQIG         | EAAQMVNTTKGIQELSDNYE |
| AH-B269A  | MKKHILSLTLGSLLVSA    | SAEDDGFYTSVGYQIG         | EAAQMVNTTKGIQELSDNYE |
| AH-B279A  | MKKHILSLALGSLLVSTLSA | EDDGFYTSVGYQIG           | EAAQMVNTTKGIQQLSDRYE |
| AH-B212A  | MKKHILSLTLGSLLVSA    | SAEDDGFYTSVGYQIG         | EAAQMVNTTKGIQELSDNYE |
| AH-B234A  | MKKHILSLTLGSLLVSTLSA | EDDGFYTSVGYQIG           | EAAQMVNTTKGIQELSDNYE |
| AH-B301A  | MKKHILSLALGSLLVSTLSA | EDDGFYTSVGYQIG           | EAAQMVNTTKGIQQLSDNYE |
| Consensus | MKKHILSLTLGSLLVSTLSA | EDDGFYTSVGYQIG           | EAAQMVNTTKGIQELSDNYE |

|           | 101                 | 150                   | 200                         |
|-----------|---------------------|-----------------------|-----------------------------|
| G27-babc  | PAYQAVSLALNAAVGLWNT | IGYAVMCGNGNGTEGGPGSVV | FVFSNEPGQKSTQITCNRYEAT      |
| KH-k17    | PAYQAVSLALNAAVGLWNT | IGYAVMCGNGNGTEGGPGSVV | FVFSNEPGQKSTQITCNRYEAT      |
| KH-k241   | PAYQAVSLALNAAVGLWNT | IGYAVMCGNGNGTEGGPGSVV | FVFSNEPGQKSTQITCNRYEAT      |
| AH-J58    | PAYQAVSLALNAAVGLWNT | IGYAVMCGNGNDTGS       | SGPGSVIFNQPGQGSTTITCNRYE    |
| AH-J68    | PAYQAVSLALNAAVGLWNT | IGYAVMCGNGNGTGGGPGSVI | FNGQPGQNSTAITCNRF           |
| AH-J44    | PAYQAVSLALNAAVGLWNT | IGYAVMCGNGNGTGGGPGSVV | FNDQPGQDSTQITCNRYE          |
| AH-J75    | PAYQAVSLALNAAVGLWNT | IGYAVMCGNGNGTGGGPGSVI | FDGQPGQGSTITCNRF            |
| AH-B147   | PAYQAVSLALNAAVGLWNT | IGYAVMCGNGNGTGS       | SGPGSVVFNEEPGQKSTAITCNRF    |
| AH-B175A  | PAYQAVFLALNAAVGLWNT | IGYAVMCGNGNGTGS       | SGPGSVIFNNQPGQSSNITCNRF     |
| AH-B201A  | PAYQAVSLALNAAVGLWNT | IGYAVMCGNGNGTDS       | SGPGSVIFNKQPGQSTKITCNRYE    |
| AH-B253A  | PAYQAVSLALNAAVGLWNT | IGYAVMCGNGNDTDS       | SGPGSVVFNGEPGEHSTAITCNRF    |
| AH-B269A  | PAYQAVSLALNAAVGLWNT | IGYAVMCGNGNGTGS       | SGPGSVIFNGEPGQSTAITCNRF     |
| AH-B279A  | PAYQAVSLALNAAVGLWNT | IGYAVMCGNGNGTGS       | SGPGSVIFNGQPGQSTQITCNRF     |
| AH-B212A  | PAYQAVFLALNAAVGLWNT | IGYAVMCGNGNGTGGG      | PGRVIFNGQPGAHSTHICDRYE      |
| AH-B234A  | PAYQAVSLALNAAVGLWNT | IGYAVMCGNGNNTGGG      | PGSVIFKQPGQNSTAITCDRYE      |
| AH-B301A  | PAYQAVSLALNAAVGLWNT | IGYAVMCGNGNDTGS       | SGPGSVVFSGEPGENSTQITCNRYE   |
| Consensus | PAYQAVSLALNAAVGLWNT | IGYAVMCGNGNGTGS       | SGPGSVIFNGQPGQ ST ITCNRYEAT |

|           | 201                | -VR1-                                            | 250                                                         | 300                                    |
|-----------|--------------------|--------------------------------------------------|-------------------------------------------------------------|----------------------------------------|
| G27-babC  | VTVEYEYECQNNN      | --GNNINDGVNQFCRAKNGSSSSGS                        | ---NDTSTQTTTQDGVITITTYSN                                    | ----NKATVNF SITNNAQELLNQAANIMQVLNTQCPL |
| KH-k17    | VTVEYEYECQNNN      | --GNNINDGVNQFCRAKNGSSSSGS                        | ---NDTSTQTTTQDGVITITTYSN                                    | ----NKATVNF SITNNAQELLNQAANIMQVLNTQCPL |
| KH-k241   | VTVEYEYECQNNN      | --GNNINDGVNQFCRAKNGSSSSGS                        | ---NDTSTQTTTQDGVITITTYSN                                    | ----NKATVNF SITNNAQELLNQAANIMQVLNTQCPL |
| AH-J58    | VSVNYHYECKQIN      | ---SEINGGVNQFCQAKNGSSSNHNGSNGTSTQTTTQDGVITITTYK  | ----NKATVNF SITNNAQELLNQAANIMQVLNTQCPL                      | ----NKATVNF SITNNAQELLNQAANIMQVLNTQCPL |
| AH-J68    | VTVKYTYECQEAKD     | ---SKINNGVDQFCQAKNGSSSNHNGSNGTSTQTTTQDGVITITTYNN | ----NKATVNF SITNNAQELLNQAANIMQVLNTQCPL                      | ----NKATVNF SITNNAQELLNQAANIMQVLNTQCPL |
| AH-J44    | VNVEYGYECKQKDD     | -SDSSISGGVNVQFCQAEHGS                            | ---GT---NGNSTTTTQDGVITITTYHN                                | ----NNATVNFQIINNAQELLNQAANIMQVLNTQCPL  |
| AH-J75    | VNVSYKYECKQENR     | -----TNGGVVQFCQAKNGSS                            | ---NGNGTTTQDGVITITTYNN                                      | ---KDKATVSFGITNNAQQLLNQAANIMQVLNTQCPL  |
| AH-B147   | VKNVNTYECQTS       | -----NINGGVNQFCQK-NGSS                           | -----GSNSTSTQTTNQDGVITITTYND                                | ----HKATVNFNITNNAQELLNQAANIMQVLNTQCPL  |
| AH-B175A  | VNVKYEYECQQT       | ---S-INGGVNQFCQAKNGSS                            | -----NSTSKQMTNQDGVITITTYNN                                  | ----NKAIVTFSITNNAQQLLNQAANIMQVLNTQCPL  |
| AH-B201A  | VNITYEYKCEQT       | -----ADINGGVVQFCRAKNGSS                          | ---GSNGSNGTSTQITTTQDGVITITTYSD                              | ----NNATVNF SITNNAQELLNQAANIMQVLNTQCPL |
| AH-B253A  | VNVKYEYECQKNQ      | ---AINGGVNQFCQAKNGSS                             | -----G---TSTQTTTQDGVITITTYGG                                | ----NKATVEFDITNNAEQLLNQAANIMQVLNTQCPL  |
| AH-B269A  | VNVNNTYECRHNNDNDNN | INGGVNQFCQAKNGSSGTS                              | SGSDSNSSTQTTTQDGMITITTYSD                                   | ----NKATVNF SITNNAEQLLNQAANIMQVLNTQCPL |
| AH-B279A  | VNVSYEYECQTS       | -----DINGGVDQFCQVKNSSGTG                         | -----TQTTNQDGVITITTYNN                                      | ----NKATVNFNITNNAQQLLNQAANIMQVLNTQCPL  |
| AH-B212A  | VSVSYEYECQSNDSNDSS | INGGVNQFCQTKNGSS                                 | -----GSNGSDVQTTTQDGVKIITEYRN                                | ----NKATVNF SITNNAQQLLNQAANIMQVLNTQCPL |
| AH-B234A  | VNVEYEYECNQKNN     | -----INGGVDQFCRAKNGSSSSSSG                       | -TNGTSTQTTTQDGVITITTYHNNNNNSATVKFDITNNAEQLLNQAANIMQVLNTQCPL | ----NKATVNF SITNNAQQLLNQAANIMQVLNTQCPL |
| AH-B301A  | VEIKYNYECNQ        | TANNQDANINGGVNQFCQAKN                            | -----GNTTQTTTQDGVITITTYNN                                   | ----NKAIVNF SITNNAQQLLAQAANIMQVLNTQCPL |
| Consensus | VNV YEYECQ         | N INGGVNVQFCQAKNGSS S                            | NGTSTQTTTQDGVITITTY N                                       | NKATVNF SITNNAQQLLNQAANIMQVLNTQCPL     |

|           | 301                 |                        | 350                                                                   | 400 |
|-----------|---------------------|------------------------|-----------------------------------------------------------------------|-----|
| G27-babC  | VRSTHDENNA          | GNPNWGLSTSGNACQIFQQEF  | SQVTSMIKNAQEIVAQSQIANANQKAEIANPSNFPFTDASFAQSMLKNARAQAEMFNLAEQVKKNLE   |     |
| KH-k17    | VRSTHDENNA          | GNPNWGLSTSGNACQIFQQEF  | SQVTSMIKNAQEIVAQSQIANANQKAEIANPSNFPFTDASFAQSMLKNARAQAEMFNLAEQVKKNLE   |     |
| KH-k241   | VRSTHDENNA          | GNPNWGLSTSGNACQIFQQEF  | SQVTSMIKNAQEIVAQSQIANANQKAEIANPSNFPFTDASFAQSMLKNARAQAEMFNLAEQVKKNLE   |     |
| AH-J58    | VRSMHDVNAKGDGQ      | PWGLSTTGNACTIFQQEF     | SQVTSMIKNAQEIVAQSKIANANQKAEISNPSNFPYTDASFSQSMLKNARAQAEMFNLAEQVKKNLE   |     |
| AH-J68    | VRSTSNENRPGNGSPWGL  | TTGGDACQIFQQEF         | SQVTSMIKNAQEIIAQSKIANAKQAEIANPSNFPFTDASFAQSMLKNARAQAEMFNLSQVKKNLE     |     |
| AH-J44    | VRSSHDQNASGDGRPWGL  | STSGDACQIFQQEF         | SQVTSMIKNAQEIVAQSQIANANQKAEISNPSNFPFTDASFAQGMKNAQAQAEMFNLSQVKKNLE     |     |
| AH-J75    | VRSKNNENVQDGS       | PWGLSTSGDACQIFQQEF     | SQVTSMIKNAQEIVAQSKIANANQNAEIANPSNFPFTDASFAQDMLKNARAQAEMFNLAEQVKKNLE   |     |
| AH-B147   | VRSMYNNVPGGQ        | PWGLSTSGDACQIFQQEF     | SQVTSMIKNAQEIVVQSEIANTNQNAQIHNPSNFPFTDASFAQGMLANARAQAEMFNLAEQVKKNLE   |     |
| AH-B175A  | VRSRHDENNASGDGSPWGL | STSGDACQIFQQEF         | SQVTSMIKNAQEIVAQSKIANANQKAEIANPSNFPFTDASFAQDMLKNARAQAEMFNLAEQVKKNLE   |     |
| AH-B201A  | VRSRHNNASGDGSPWGL   | STSGDACQIFQQEF         | SAVTSMIKNAKEIVAQSKIANANQKVEIANPSNFPFTDASFAQDMLKNARAQAEMFNLAEQVKKNLE   |     |
| AH-B253A  | VRSTNENKPGGQ        | PWGLSTHGNACQIFQQEF     | SAVTSMIKNAKEIVAQSKIANANQKVEIANPSNFPFTDASFAQDMLKNARAQAEMFNLAEQVKKNLE   |     |
| AH-B269A  | VRSTHDVNASGDGQ      | PWGLTTSGDACQIFQQEF     | SQVTSMIKNAQEIVAQSKIANANQKAEIHNPSNFPFTDASFAQSMLKNARAQAEMFNLAEQVKKNLE   |     |
| AH-B279A  | VRSTNDVNTPGGQ       | PWGLSTSGDACQIFQQEF     | SQVTSMIKNAQEIVAQSKIANANQKAEISNPSNFPFTDASFAQDMLKNARAQAEMFNLAEQVQNLE    |     |
| AH-B212A  | VRSMYHVNNDG         | SPWGLSTSGNACTIFQQEF    | SQVTSMIKNAQEIVAQSQIANANRRAEISNPSNFPFTDASFAQSMLKNARAQAEMFNLAEQVKKNLE   |     |
| AH-B234A  | VRSTHSENAQGDGK      | PWGLSTSGNACQIFQQEF     | SQVTSMIKNAQEIVAQSKIANNNQKAEIANPSSFNFPYTDAGFAQSMLKNARAQAEMFNLAEQVKKNLE |     |
| AH-B301A  | VRSTNNANAPGDGR      | PWGLSTSGNACQIFQQEF     | SQVTSMIKNAQEIVAQSKIANANQKAEITNPSNFPFTDASFAQSMLKNARAQAEMFNLAEQVKKNLE   |     |
| Consensus | VRSTHDEN            | GDGQPWGLSTSGNACQIFQQEF | SQVTSMIKNAQEIVAQSKIANANQKAEIANPSNFPFTDASFAQSMLKNARAQAEMFNLAEQVKKNLE   |     |

|           | 401      | -VR2-     | 450                | 500           |                 |                    |               |               |                |               |
|-----------|----------|-----------|--------------------|---------------|-----------------|--------------------|---------------|---------------|----------------|---------------|
| G27-babC  | VMQNNNNV | NAELSGFGK | GMTNFVSAFLASCRN    | GGTLPNEGVT    | SNTWGAGCAYVGETI | SALNNSIAHF         | GTQEQQIQQAENI | ADTLVNF       | FKSRYSELGNTYN  |               |
| KH-k17    | VMQNNNNV | NAELSGFGK | GMTNFVSAFLASCRN    | GGTLPNEGVT    | SNTWGAGCAYVGETI | SALNNSIAHF         | GTQEQQIQQAENI | ADTLVNF       | FKSRYSELGNTYN  |               |
| KH-k241   | VMQNNNNV | NAELSGFGK | GMTNFVSAFLASCRN    | GGTLPNEGVT    | SNTWGAGCAYVGETI | SALNNSIAHF         | GTQEQQIQQAENI | ADTLVNF       | FKSRYSG-----   |               |
| AH-J58    | VMQNNNNV | -KE----   | GKGTNFVSAFLANCH    | NGGGTLPNAGVT  | SNTWGAGCAYVGETI | TALNNSIAHF         | GTQAQQIQQAADI | ADTLVNF       | FKSRYSELGNTYN  |               |
| AH-J68    | VMQNNNNV | NKKLSGFG  | EGMTNFVSAFLASCK    | DGG-TLPNEGVT  | FNTWGAGCAYVGETI | TALNNSIAHF         | GTQAQQIQQAENI | ADTLVNF       | FKSRYSELGNTYN  |               |
| AH-J44    | VMQNNNNV | ----GGF   | GKMTNFVSAFLASCK    | DGGTLPNQGV    | TNTWGAGCAYVQETI | TALNNSIAHF         | GTQAQQIQQAENI | ADTLVNF       | HFKSRYNELGNTYN |               |
| AH-J75    | VMQNNNNV | DANLSGFG  | KGMTNFVSAFLASCK    | DGG-TLPNEGVT  | SNTWGAGCAYVEETI | TALNNSIAHF         | GTQAQQIQQAENI | ADTLVNF       | FKSRYSELGNTYN  |               |
| AH-B147   | VMQNNNNV | II-----   | DGKATNFVSAFLATCK   | VDDG-TLPNAGVT | SNTWGAGCAYVGETI | TALNNSIAHF         | GTQEQQIQQAENI | ADTLVNF       | FKSRYSELGNTYN  |               |
| AH-B175A  | VMQNNNNV | NVNL      | SRLGERMTNFVSAFLAS  | CRDDG-TLPDQGV | TNTWGAGCAYVGETI | TALNNSIAHF         | GTQAQQIQQAENI | ADTLVNF       | FKSRYSELGNTYN  |               |
| AH-B201A  | VMENIT   | -V--TGY-- | GN-NQNFVSAFLASCK   | ADG-TLPNHGVT  | SNTWGAGCAYVEETI | STLNNSIAHF         | GTQEQQIQQAENI | ADTLVNF       | FKSRYSELGNTYN  |               |
| AH-B253A  | VMKNNNNV | TI-----   | EGKATNFVSAFLASCK   | ADG-TLPNAGVT  | SNTWGAGCAYVGETI | TALNNSIAHF         | GTQEQQIQQAENI | ADTLVNF       | FKSRYSELGNTYN  |               |
| AH-B269A  | VMQNNNNV | NAELSGFG  | TGMTNFVSAFLASCK    | NGG-TLPNEGVT  | RTSWGAGCAYVGETI | TALNNSIAHF         | GTQAQQIQQAENI | ADTLVNF       | FKSRYNELGNTYN  |               |
| AH-B279A  | VMENNNNV | TI-----   | GFGSGMTNFVSAFLATCK | VDDG-TLPNAGVT | SNTWGAGCAYVGETI | TALNNSIAHF         | GTQAQQIQQAENI | ADTLVNF       | FKSRYNELGNTYN  |               |
| AH-B212A  | VMQNNNNV | KI-----   | DGGLTNFVSAFLASCR   | HDDG-TLPNAGVT | NNTWGAGCAYVGETI | SALTNSIAHF         | GTQAQQIQQAENI | ADTLVNF       | FKSKYSELGNTYN  |               |
| AH-B234A  | VMQNNNNV | DAGLSGFG  | KGMTNFVSAFLASCK    | DGG-TLPDAGVT  | SDTWGAGCAYVQETI | TALNNSIAHF         | GTQAQQIQQAENI | ADTLVNF       | FKSKYSELGNTYN  |               |
| AH-B301A  | VMQNNNNV | NKKLSGFG  | EGMTNFVSAFLASCR    | DDG-TLPNAGVT  | SNTWGAGCAYVGETI | TALNNSIAHF         | GTQEQQIQQAENI | ADTLVNF       | FKSRYNELGNTYN  |               |
| Consensus | VMQNNNNV | LSGFG     | GMTNFVSAFLASCK     | GG            | TLPN            | GVTSNTWGAGCAYVGETI | TALNNSIAHF    | GTQAQQIQQAENI | ADTLVNF        | FKSRYSELGNTYN |

|           | 501        | 550       | 600                                                                               |
|-----------|------------|-----------|-----------------------------------------------------------------------------------|
| G27-babC  | SITTALSSIP | NGSSLQNVV | SKKNNPYPSPQGIETNYYLNQNSYNQVQTINQELGRNPFRKVGIVSSQTNNGAMNIGIQVGYKQFFGQKRKWGARYYGFFD |
| KH-k17    | SITTALSSIP | NGSSLQNVV | SKKNNPYPSPQGIETNYYLNQNSYNQVQTINQELGRNPFRKVGIVSSQTNNGAMNIGIQVGYKQFFGQKRKWGARYYGFFD |
| KH-k241   | -----      | -----     | -----KVGIVSSQTNNGAMNIGIQVGYKQFFGQKRKWGARYYGFFD                                    |
| AH-J58    | SITTALSSIP | NAQSLQNAV | SKKNNPYPSPQGIETNYYLNQNTYNQIQTINQELGRNPFRKVGIVSSQTNNGAMNIGIQVGYKQFFGQKRKWGARYYGFFD |
| AH-J68    | SITTALSSIP | NVQSLQNVV | GKNNPYPSPQGIETNYYLNQNAYNQIQTINQELGRNPFRKVGIVSSQTNNGAMNIGIQVGYKQFFGQKRKWGARYYGFFD  |
| AH-J44    | SITTALSKVP | NAQSLQNVV | GKNNPYPSPQGIETNYYLNQNSYNQIQTINQELGRNPFRKVGIVSSQTNNGAMNIGIQVGYKQFFGQKRKWGARYYGFFD  |
| AH-J75    | SITTALSKVP | NAQSLQNVV | SKKNNPYPSPQGIETNYYLNQNSYNQIQTINQELGRNPFRKVGIVSSQTNNGAMNIGIQVGYKQFFGQKRKWGARYYGFFD |
| AH-B147   | SITTALSKVP | NAQSLQNAV | SKKNNPYPSPQGIETNYYLNQNSYNQIQTINQELGRNPFRKVGIVSSQTNNGAMNIGIQVGYKQFFGQKRKWGARYYGFFD |
| AH-B175A  | SITTALSSIP | NAQSLQNAV | NKNNPYPSPQGIETNYYLNQNSYNQIQTINQELGRNPFRKVGIVSSQTNNGAMNIGIQVGYKQFFGQKRKWGARYYGFFD  |
| AH-B201A  | SITTALSSIP | NAQSLQNAV | SKKNNPYPSPQGIETNYYLNQNSYNQIQTINQELGRNPFRKVGIVSSQTNNGAMNIGIQVGYKQFFGQKRKWGARYYGFFD |
| AH-B253A  | SITTALSKVP | NAQSLQNAV | SKKNNPYPSPQGIETNYYLNQNSYNQIQTINQELGRNPFRKVGIVSSQTNNGAMNIGIQVGYKQFFGQKRKWGARYYGFFD |
| AH-B269A  | SITTALSSIP | NAQSLQNAV | SKKNNPYPSPQGIETNYYLNQNSYNQIQTINQELGRNPFRKVGIVSSQTNNGAMNIGIQVGYKQFFGQKRKWGARYYGFFD |
| AH-B279A  | SITTALSSIP | NAQALQNAV | SKKNNPYPSPQGIETNYYLNQNTYNQIQTINQELGRNPFRKVGIVSSQTNNGAMNIGIQVGYKQFFGQKRKWGARYYGFFD |
| AH-B212A  | SITTALSSIP | NAQSLQNAV | SKKNNPYPSPQGIETNYYLNQNSYNQIQTINQELGRNPFRKVGIVSSQTNNGAMNIGIQVGYKQFFGQKRKWGARYYGFFD |
| AH-B234A  | SITTALSNIP | NAQSLQNVV | SKKNNPYPSPQGIETNYYLNQNSYNQVQTINQELGRNPFRKVGIVSSQTNNGAMNIGIQVGYKQFFGQKRKWGARYYGFFD |
| AH-B301A  | SITTALSKVP | NAQSLQNVV | GKNNPYPSPQGIETNYYLNQNSYNQIQTINQELGRNPFRKVGIVSSQTNNGAMNIGIQVGYKQFFGQKRKWGARYYGFFD  |
| Consensus | SITTALSSIP | NAQSLQNAV | SKKNNPYPSPQGIETNYYLNQNSYNQIQTINQELGRNPFRKVGIVSSQTNNGAMNIGIQVGYKQFFGQKRKWGARYYGFFD |

|           | 601                                                                                                  | 650 | 700 |
|-----------|------------------------------------------------------------------------------------------------------|-----|-----|
| G27-babC  | YNHAFIKSSFFNSASDVWTYGFGADALYNFINDKATNFLGKNNKLSVGLFGGIALAGTSWLNSEYVNLATMNNVYNAKMNVANFQFLFNMGVRMNLARSK |     |     |
| KH-k17    | YNHAFIKSSFFNSASDVWTYGFGADALYNFINDKATNFLGKNNKLSVGLFGGIALAGTSWLNSEYVNLATMNNVYNAKMNVANFQFLFNMGVRMNLARSK |     |     |
| KH-k241   | YNHAFIKSSFFNSASDVWTYGFGADALYNFINDKATNFLGKNNKLSVGLFGGIALAGTSWLNSEYVNLATMNNVYNAKMNVANFQFLFNMGVRMNLARSK |     |     |
| AH-J58    | YNHAFIKSSFFNSASDVWTYGFGADALYNFINDKATNFLGKNNKLSVGLFGGIALAGTSWLNSEYVNLATVNNVYNAKLNVANFQFLFNMGVRMNLARSK |     |     |
| AH-J68    | YNHAFIKSSFFNSASDVWTYGFGADALYNFINDKATNFLGKNNKLSVGLFGGIALAGTSWLNSEYVNLATVNNVYNAKMNVANFQFLFNMGVRMNLARPK |     |     |
| AH-J44    | YNHAFIKSSFFNSASDVWTYGFGADALYNFINDKATNFLGKNNKLSVGLFGGIALAGTSWLNSEYVNLATMNNVYNAKMNVANFQFLFNMGVRMNLARPK |     |     |
| AH-J75    | YNHAFIKSSFFNSASDVWTYGFGADALYNFINDKATNFLGKNNKLSVGLFGGIALAGTSWLNSEYVNLATMNNVYNAKMNVANFQFLFNMGVRMNLARPK |     |     |
| AH-B147   | YNHAFIKSSFFNSASDVWTYGFGADALYNFINDKATNFLGKNNKLSVGLFGGIALAGTSWLNSEYVNLATVNNVYNAKMNVANFQFLFNMGVRMNLARPK |     |     |
| AH-B175A  | YNHAFIKSSFFNSASDVWTYGFGADALYNFINDKATNFLGKNNKLSVGLFGGIALAGTSWLNSEYVNLATVNNVYNAKMNVANFQFLFNMGVRMNLARPK |     |     |
| AH-B201A  | YNHAFIKSSFFNSASDVWTYGFGADALYNFINDKATNFLGKNNKLSVGLFGGIALSRHFMA*-----                                  |     |     |
| AH-B253A  | YNHAFIKSSFFNSASDVWTYGFGADALYNFINDKATNFLGKNNKLSVGLFGGIALAGTSWLNSEYVNLATMNNVYNAKMNVANFQFLFNMGVRMNLARPK |     |     |
| AH-B269A  | YNHAFIKSSFFNSASDVWTYGFGADALYNFINDKATNFLGKNNKLSVGLFGGIALAGTSWLNSEYVNLATMNNVYNAKMNVANFQFLFNMGVRMNLARPK |     |     |
| AH-B279A  | YNHAFIKSSFFNSASDVWTYGFGADALYNFINDKATNFLGKNNKLSVGLFGGIALAGTSWLNSEYVNLATMNNVYNAKMNVANFQFLFNMGVRMNLARSK |     |     |
| AH-B212A  | YNHAFIKSSFFNSASDVWTYGFGADALYNFINDKATNFLGKNNKLSVGLFGGIALAGTSWLNSEYVNLATVNNVYNAKMNVANFQFLFNMGVRMNLARPK |     |     |
| AH-B234A  | YNHAFIKSSFFNSASDVWTYGFGADALYNFINDKATNFLGKNNKLSVGLFGGIALAGTSWLNSEYVNLATMNNVYNAKMNVANFQFLFNMGVRMNLARSK |     |     |
| AH-B301A  | YNHAFIKSSFFNSASDVWTYGFGADALYNFINDKATNFLGKNNKLSVGLFGGIALAGTSWLNSEYVNLATMNNVYNAKLNVANFQFLFNMGVRMNLARPK |     |     |
| Consensus | YNHAFIKSSFFNSASDVWTYGFGADALYNFINDKATNFLGKNNKLSVGLFGGIALAGTSWLNSEYVNLATMNNVYNAKMNVANFQFLFNMGVRMNLARPK |     |     |
|           | 701                                                                                                  | 750 |     |
| G27-babC  | KKGSDHAAQHGIELGLKIPTINTNYYSFMGAELKYRRLYSVYLNIVFAY*                                                   |     |     |
| KH-k17    | KKGSDHAAQHGIELGLKIPTINTNYYSFMGAELKYRRLYSVYLNIVFAY*                                                   |     |     |
| KH-k241   | KKGSDHAAQHGIELGLKIPTINTNYYSFMGAELKYRRLYSVYLNIVFAY*                                                   |     |     |
| AH-J58    | KKGSDHAAQHGIELGLKIPTINTNYYSFMGAELKYRRLYSVYLNIVFAY*                                                   |     |     |
| AH-J68    | KKSDHAAQHGIELGLKIPTINTNYYSFMGAELKYRRLYSVYLNIVFAY*                                                    |     |     |
| AH-J44    | KKSDHAAQHGIELGLKIPTINTNYYSFMGAELKYRRLYSVYLNIVFAY*                                                    |     |     |
| AH-J75    | KKGSDHAAQHGIELGLKIPTINTNYYSFMGAELKYRRLYSVYLNIVFAY*                                                   |     |     |
| AH-B147   | KKSDHAAQHGIELGLKIPTINTNYYSFMGAELKYRRLYSVYLNIVFAY*                                                    |     |     |
| AH-B175A  | KKSDHAAQHGIELGLKIPTINTNYYSFMGAELKYRRLYSVYLNIVFAY*                                                    |     |     |
| AH-B201A  | -----                                                                                                |     |     |
| AH-B253A  | KKSDHAAQHGIELGLKIPTINTNYYSFMGAELKYRRLYSVYLNIVFAY*                                                    |     |     |
| AH-B269A  | KKSDHAAQHGIELGLKIPTINTNYYSFMGAELKYRRLYSVYLNIVFAY*                                                    |     |     |
| AH-B279A  | KKSDHAAQHGIELGLKIPTINTNYYSFMGAELKYRRLYSVYLNIVFAY*                                                    |     |     |
| AH-B212A  | KKSDHAAQHGIELGLKIPTINTNYYSFMGAELKYRRLYSVYLNIVFAY*                                                    |     |     |
| AH-B234A  | KKSDHAAQHGIELGLKIPTINTNYYSFMGAELKYRRLYSVYLNIVFAY*                                                    |     |     |
| AH-B301A  | KKSDHAAQHGIELGLKIPTINTNYYSFMGAELKYRRLYSVYLNIVFAY*                                                    |     |     |
| Consensus | KKSDHAAQHGIELGLKIPTINTNYYSFMGAELKYRRLYSVYLNIVFAY                                                     |     |     |

S3 Fig. Alignment of the amino acid sequences of 13 BabCs and 1 BabBC (AH-J68).
